# Supplementary material
Source: HighWire-hosted journal article supplement (doi:10.1101/rna.079732.123)
Supplement: Supplemental_Legends_Refs_.docx [file Supplemental_Legends_Refs_.docx]

**Supplemental material**

**Thioredoxin regulates the redox state and the activity of the human tRNA ligase complex**

**Dhaarsini Jaksch1,2, Johanna Irnstorfer1, Petra-Franziska Kalman1, and Javier Martinez1,***

1 Max Perutz Laboratories, Medical University of Vienna, Vienna Biocenter (VBC), Dr. Bohr-Gasse 9/2, 1030 Vienna, Austria

2 Vienna Biocenter PhD Program, a Doctoral School of the University of Vienna and Medical University of Vienna, 1030 Vienna, Austria

* Corresponding author. email address: [javier.martinez@meduniwien.ac.at](mailto:javier.martinez@meduniwien.ac.at)

**Suppl. Figure 1, related to Figure 1: Depletion of TRX by shRNAs sensitizes the tRNA-LC to oxidative stress**

1. HeLa cells expressing shTRX or shCtrl upon addition of 2 µg/mL Dox for 3 days were lysed and extracts were analyzed by western blot using an anti-TRX antibody and anti-RTCB antibody. Levels of beta-Actin were assessed as a loading control.
2. RNA was isolated from HeLa cells expressing shTRX, either induced with 2 µg/mL Dox or left uninduced for 3 days. Silencing of *TXN* mRNA levels relative to *ACTB* mRNA levels was assessed by RT-qPCR.
3. ShCtrl and shTRX cells were treated with increasing concentrations of H2O2 for 1 h before harvest and lysis. Cell lysates were assayed for RNA ligation activity as in Fig. 1A.
4. Quantification of band intensities from Suppl. Fig. 1C. The substrate conversion rate was calculated as in Fig. 1B, with n=3.
5. Levels of RTCB and TRX were assessed in shTRX and shCtrl cell lysates after treatment with increasing concentrations of H2O2 for 1 h by western blot using anti-RTCB and anti-TRX antibodies. Levels of beta-Actin were used as a loading control.

**Suppl. Figure 2, related to Figure 2: Catalytically active TRX is required to maintain tRNA-LC activity during oxidative stress and for its re-activation after oxidative stress levels decrease.**

1. FLAG-tagged variants of TRX CxxC and SxxS used for overexpression and testing of tRNA-LC activity after menadione treatment. Mutations of the active site in the variants are depicted in red. Three conserved cysteines close to the C-terminus were mutated to alanine to avoid involvement of the cysteines in redox reactions (Watson et al. 2003; Schwertassek et al. 2007).
2. FLAG-tagged TRX CxxC or SxxS double mutant were overexpressed in shTRX cells. Levels of endogenous TRX in shCtrl, shTRX and rescue cell lines thereof were analysed by western blot. Anti-TRX or anti-FLAG antibodies were used, and beta-actin levels were assessed as a loading control.
3. HeLa cells were transfected with siRNA pools targeting *TXN* mRNA (siTRX) or a control siRNA (siCtrl) for 3 days. Cells were treated with increasing concentrations of menadione for 1 h and RNA ligase activity was assessed as in Fig. 2A.
4. HeLa cells were transfected with siRNA pools targeting *TXN* mRNA (siTRX) or a control siRNA (siCtrl) for 3 days. Cells were treated with increasing concentrations of H2O2 for 1 h and RNA ligase activity was assessed as in Fig. 2A.
5. RTCB and TRX protein levels were assessed by western blot in cell lysates of siCtrl and siTRX transfected cells after treatment with 30 µM menadione and different recovery times in CHX-containing medium using anti-RTCB and anti-TRX antibodies. Beta-actin levels were assessed as a loading control.
6. RTCB and TRX protein levels were assessed by western blot in cell lysates of siCtrl and siTRX transfected cells after treatment with 125 µM H2O2 and different recovery times in CHX-containing medium as described in Suppl. Fig. 2E.

**Suppl. Figure 3, related to Figure 4: Depletion of TRX impairs physiological functions of the tRNA-LC.**

1. ShCtrl and shTRX cells were treated with indicated menadione concentrations and 1,5 µg/mL Tm for 4 h before harvest. RT-qPCR analysis of *DNAJB9* levels was performed as described in Fig. 4C, with n=9.
2. HEK293 FITR cells expressing GFP-XBP1intron-mCherry were transfected with siRNA pools targeting *RTCB* and *Archease* mRNA (siRTCB/siArch) or control siRNA (siCtrl) for 3 days. Expression of the reporter construct was induced for 5 h using 2 µg/mL Dox and UPR was induced with 300 nM Tg. Splicing of the intron (generation of GFP-mCherry fusion protein) was assessed as in Fig. 4F, with n=3.

**Supplemental references**

Schwertassek U, Balmer Y, Gutscher M, Weingarten L, Preuss M, Engelhard J, Winkler M, Dick TP. 2007. Selective redox regulation of cytokine receptor signaling by extracellular thioredoxin-1. *EMBO J* **26**: 3086-3097.

Watson WH, Pohl J, Montfort WR, Stuchlik O, Reed MS, Powis G, Jones DP. 2003. Redox potential of human thioredoxin 1 and identification of a second dithiol/disulfide motif. *J Biol Chem* **278**: 33408-33415.
